# Supplementary material
Source: ML conference proceedings conference paper supplement (https://openaccess.thecvf.com/content/ICCV2023/html/Liu_Zero-1-to-3_Zero-shot_One_ICCV_2023_paper.html)
Supplement: Supplementary file 3 [file Liu_Zero-1-to-3_Zero-shot_One_ICCV_2023_supplemental.zip]

Archive with 2 entries (2 files):
- zero123_appendix.pdf
- __MACOSX/._zero123_appendix.pdf
